# Supplementary material for: Plant-endophytes interaction influences the secondary metabolism in Echinacea purpurea (L.) Moench: an in vitro model
Source: PubMed Central journal article supplement (PMC5717142; doi:10.1038/s41598-017-17110-w), 2017-12-05

**Plant-endophytes interaction influences the secondary metabolism in *Echinacea purpurea* (L.)**

**Moench: an *in vitro* model.**

Valentina Maggini<sup>1,2,3</sup>, Marinella De Leo<sup>4</sup>, Alessio Mengoni<sup>1</sup>, Eugenia Rosaria Gallo<sup>2,3</sup>, Elisangela Miceli<sup>1</sup>, Rose Vanessa Bandeira Reidel<sup>4</sup>, Sauro Biffi<sup>5</sup>, Luisa Pistelli<sup>4</sup>, Renato Fani<sup>1</sup>, Fabio Firenzuoli<sup>3</sup> and Patrizia Bogani<sup>1</sup>

<sup>1</sup>Department of Biology, University of Florence, Via Madonna del Piano 6, 50019 Sesto Fiorentino, Italy; <sup>2</sup>Department of Experimental and Clinical Medicine, University of Florence, Largo Brambilla 3, 50134 Florence, Italy; <sup>3</sup>Referring Center for Phytotherapy, Tuscany Region, Careggi University Hospital, Largo Brambilla 3, 50134 Florence, Italy; <sup>4</sup>Department of Pharmacy, University of Pisa, Via Bonanno 33, 56126 Pisa, Italy; <sup>5</sup>Botanical Garden Casola Valsenio, Via del Corso 6, 48010 Ravenna, Italy

**Supplementary Figure 1.** HPLC-PDA/UV(detected at 260 nm) alkamide profiles from *n*-hexane extracts of control and infected *E. purpurea* stem/leaves (SL). For peak data, see Supplementary Table 3. Identified compounds are listed in Table 1.

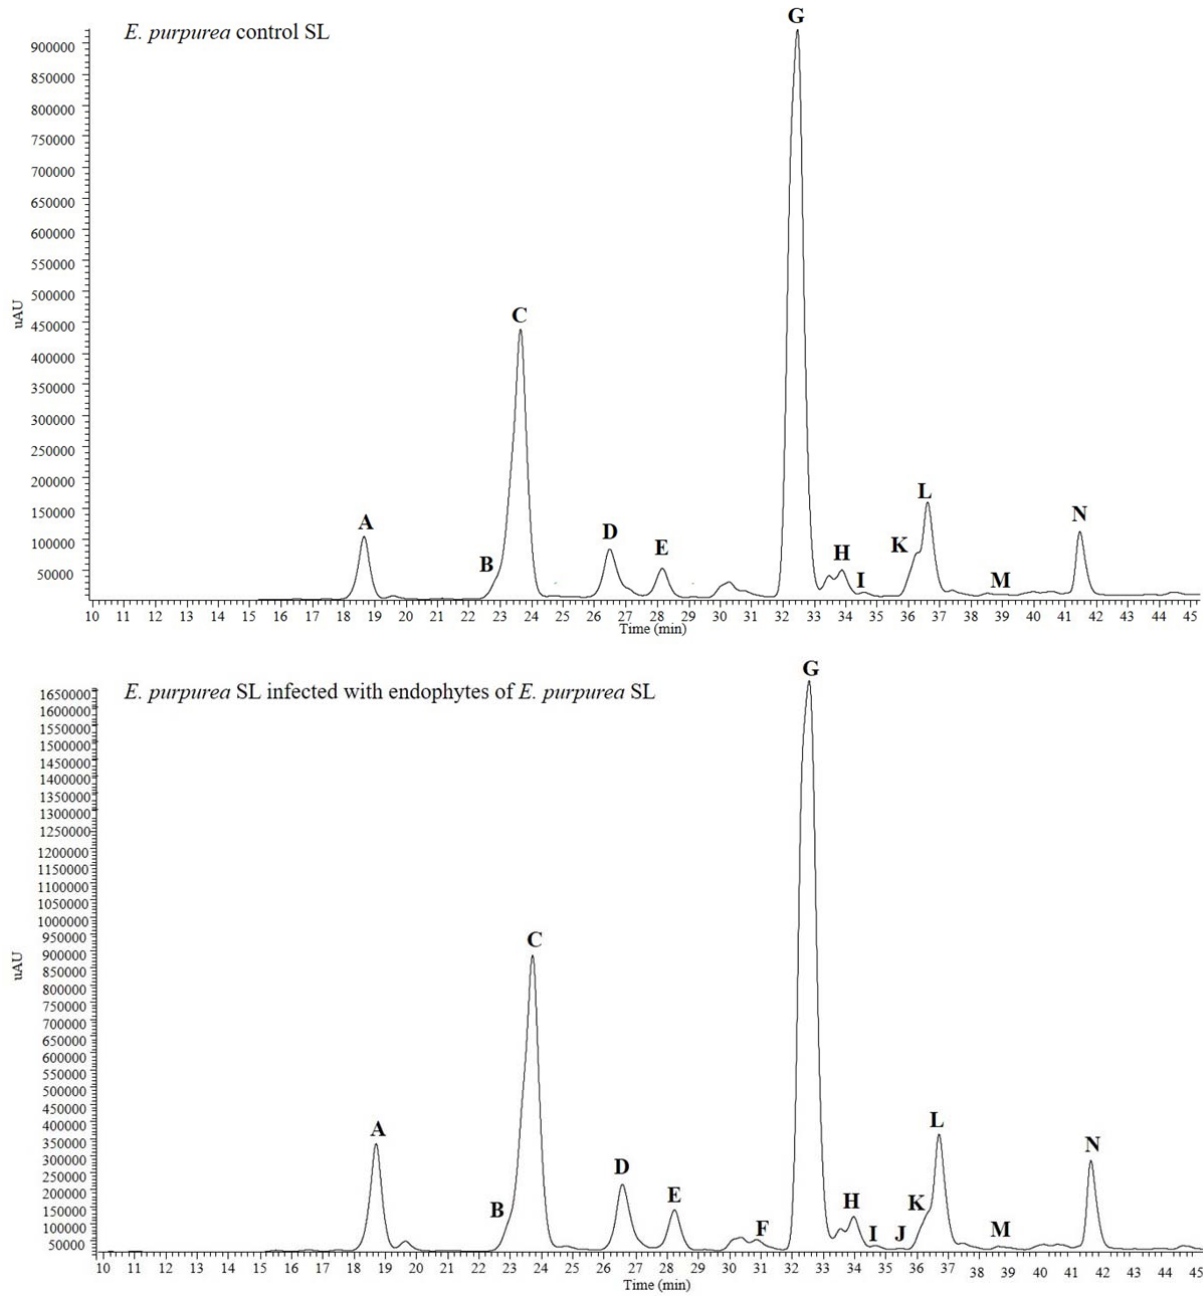

Supplement: 41598_2017_17110_MOESM1_ESM.pdf [file 41598_2017_17110_MOESM1_ESM.pdf]
