# Supplementary material for: Plant-endophytes interaction influences the secondary metabolism in Echinacea purpurea (L.) Moench: an in vitro model
Source: PubMed Central journal article supplement (PMC5717142; doi:10.1038/s41598-017-17110-w), 2017-12-05
Supplement: 41598_2017_17110_MOESM3_ESM.pdf [file 41598_2017_17110_MOESM3_ESM.pdf]

**Plant-endophytes interaction influences the secondary metabolism in *Echinacea purpurea* (L.)**

**Moench: an *in vitro* model.**

Valentina Maggini<sup>1,2,3</sup>, Marinella De Leo<sup>4</sup>, Alessio Mengoni<sup>1</sup>, Eugenia Rosaria Gallo<sup>2,3</sup>, Elisangela Miceli<sup>1</sup>, Rose Vanessa Bandeira Reidel<sup>4</sup>, Sauro Biffi<sup>5</sup>, Luisa Pistelli<sup>4</sup>, Renato Fani<sup>1</sup>, Fabio Firenzuoli<sup>3</sup> and Patrizia Bogani<sup>1</sup>

<sup>1</sup>Department of Biology, University of Florence, Via Madonna del Piano 6, 50019 Sesto Fiorentino, Italy; <sup>2</sup>Department of Experimental and Clinical Medicine, University of Florence, Largo Brambilla 3, 50134 Florence, Italy; <sup>3</sup>Referring Center for Phytotherapy, Tuscany Region, Careggi University Hospital, Largo Brambilla 3, 50134 Florence, Italy; <sup>4</sup>Department of Pharmacy, University of Pisa, Via Bonanno 33, 56126 Pisa, Italy; <sup>5</sup>Botanical Garden Casola Valsenio, Via del Corso 6, 48010 Ravenna, Italy

**Supplementary Table 1.** The thirty-seven bacterial strains from *E. purpurea* used in this work.

| <b>Strain code</b> | <b>Genus</b>                | <b>GenBank accession of partial 16S rRNA gene sequence</b> |
|--------------------|-----------------------------|------------------------------------------------------------|
| EpSL1              | <i>Curtobacterium</i> sp.   | KJ642423                                                   |
| EpSL2              | <i>Curtobacterium</i> sp.   | KJ642424                                                   |
| EpSL4              | <i>Microbacterium</i> sp.   | KJ642438                                                   |
| EpSL5              | <i>Bacillus</i> sp.         | KJ642422                                                   |
| EpSL16             | <i>Arthrobacter</i> sp.     | KJ642432                                                   |
| EpSL17             | <i>Staphylococcus</i> sp.   | KJ642469                                                   |
| EpSL18             | <i>Arthrobacter</i> sp.     | KJ642419                                                   |
| EpSL20             | <i>Pseudomonas</i> sp.      | KJ642444                                                   |
| EpSL22             | <i>Staphylococcus</i> sp.   | KJ642476                                                   |
| EpSL25             | <i>Pseudomonas</i> sp.      | KJ642442                                                   |
| EpSL27             | <i>Arthrobacter</i> sp.     | KJ642420                                                   |
| EpSL31             | <i>Rhodobacter</i> sp.      | KJ642453                                                   |
| EpSL32             | <i>Sphingomonas</i> sp.     | KJ642455                                                   |
| EpSL34             | <i>Staphylococcus</i> sp.   | KJ642465                                                   |
| EpSL35             | <i>Arthrobacter</i> sp.     | KJ642421                                                   |
| EpSL37             | <i>Pseudomonas</i> sp.      | KJ642443                                                   |
| EpSL39             | <i>Pseudomonas</i> sp.      | KJ642336                                                   |
| EpSL40             | <i>Staphylococcus</i> sp.   | KJ642466                                                   |
| EpSL43             | <i>Pseudomonas</i> sp.      | KJ642443                                                   |
| EpSL50             | <i>Sphingomonas</i> sp.     | KJ642457                                                   |
| EpSL54             | <i>Frigoribacterium</i> sp. | KJ642425                                                   |
| EpSL59             | <i>Frigoribacterium</i> sp. | KJ642426                                                   |
| EpSL62             | <i>Staphylococcus</i> sp.   | KJ642472                                                   |
| EpSL64             | <i>Frigoribacterium</i> sp. | KJ642427                                                   |
| EpSL65             | <i>Microbacterium</i> sp.   | KJ642440                                                   |
| EpSL70             | <i>Sphingomonas</i> sp.     | KJ642460                                                   |
| EpSL80             | <i>Frigoribacterium</i> sp. | KJ642428                                                   |
| EpSL81             | <i>Agrococcus</i> sp.       | KJ642418                                                   |
| EpSL82             | <i>Methylobacterium</i> sp. | KJ642437                                                   |
| EpSL83             | <i>Sphingomonas</i> sp.     | KJ642462                                                   |
| EpSL84             | <i>Frigoribacterium</i> sp. | KJ642430                                                   |
| EpSL87             | <i>Kineococcus</i> sp.      | KJ778698                                                   |
| EpSL89             | <i>Staphylococcus</i> sp.   | KJ642473                                                   |
| EpSL91             | <i>Frigoribacterium</i> sp. | KJ642429                                                   |
| EpSL95             | <i>Staphylococcus</i> sp.   | KJ642470                                                   |
| EpSL96             | <i>Staphylococcus</i> sp.   | KJ642474                                                   |
| EpSL102            | <i>Staphylococcus</i> sp.   | KJ642464                                                   |
