# Supplementary material for: Plant-endophytes interaction influences the secondary metabolism in Echinacea purpurea (L.) Moench: an in vitro model
Source: PubMed Central journal article supplement (PMC5717142; doi:10.1038/s41598-017-17110-w), 2017-12-05
Supplement: 41598_2017_17110_MOESM6_ESM.pdf [file 41598_2017_17110_MOESM6_ESM.pdf]

**Plant-endophytes interaction influences the secondary metabolism in *Echinacea purpurea* (L.)**

**Moench: an *in vitro* model.**

Valentina Maggini<sup>1,2,3</sup>, Marinella De Leo<sup>4</sup>, Alessio Mengoni<sup>1</sup>, Eugenia Rosaria Gallo<sup>2,3</sup>, Elisangela Miceli<sup>1</sup>, Rose Vanessa Bandeira Reidel<sup>4</sup>, Sauro Biffi<sup>5</sup>, Luisa Pistelli<sup>4</sup>, Renato Fani<sup>1</sup>, Fabio Firenzuoli<sup>3</sup> and Patrizia Bogani<sup>1</sup>

<sup>1</sup>Department of Biology, University of Florence, Via Madonna del Piano 6, 50019 Sesto Fiorentino, Italy; <sup>2</sup>Department of Experimental and Clinical Medicine, University of Florence, Largo Brambilla 3, 50134 Florence, Italy; <sup>3</sup>Referring Center for Phytotherapy, Tuscany Region, Careggi University Hospital, Largo Brambilla 3, 50134 Florence, Italy; <sup>4</sup>Department of Pharmacy, University of Pisa, Via Bonanno 33, 56126 Pisa, Italy; <sup>5</sup>Botanical Garden Casola Valsenio, Via del Corso 6, 48010 Ravenna, Italy

**Supplementary Table 4.** Average, standard deviation (SD) and percentage of abundance of the alkamides identified in the extracts from R and SL samples (CSL: stem/leaves extract from control plants; ISL: stem/leaves extract from infected plants; CR: root extract from control plants; IR: root extract from infected plants). Pairwise comparison (Tukey HSD) was performed between all the samples: different letters in the same row indicate significant differences ( $P < 0.001$ ).

|            | <b>Peak Area mean <math>\pm</math> SD *10<sup>6</sup> (%)</b> |                                         |                                         |                                         |
|------------|---------------------------------------------------------------|-----------------------------------------|-----------------------------------------|-----------------------------------------|
|            | <b>C R</b>                                                    | <b>I R</b>                              | <b>C SL</b>                             | <b>I SL</b>                             |
| <b>A</b>   |                                                               |                                         | 2.672 $\pm$ 0.022 (4.33)                | 7.124 $\pm$ 0.128 (6.26)                |
| <b>B+C</b> |                                                               |                                         | 15.804 $\pm$ 0.151 (25.60)              | 28.915 $\pm$ 0.143 (25.41)              |
| <b>D</b>   | 0.219 $\pm$ 0.007 (2.11)                                      | 0.530 $\pm$ 0.020 (3.01)                | 2.028 $\pm$ 0.018 (3.27)                | 4.842 $\pm$ 0.365 (4.26)                |
| <b>E</b>   |                                                               |                                         | 1.114 $\pm$ 0.034 (1.80)                | 2.350 $\pm$ 0.198 (2.06)                |
| <b>F</b>   |                                                               |                                         |                                         | 0.401 $\pm$ 0.105 (0.35)                |
| <b>G</b>   | 7.435 $\pm$ 0.427 (71.35) <sup>a</sup>                        | 13.906 $\pm$ 0.098 (78.81) <sup>b</sup> | 32.494 $\pm$ 0.169 (52.64) <sup>c</sup> | 55.107 $\pm$ 0.050 (48.44) <sup>d</sup> |
| <b>H</b>   |                                                               |                                         | 0.394 $\pm$ 0.058 (0.64)                | 0.899 $\pm$ 0.008 (0.79)                |
| <b>I</b>   |                                                               |                                         | 0.055 $\pm$ 0.002 (0.09)                | 0.067 $\pm$ 0.006 (0.06)                |
| <b>J</b>   | 0.028 $\pm$ 0.020 (0.27)                                      | 0.136 $\pm$ 0.011 (0.77)                | 0.001 $\pm$ 0.001 (0.01)                | 0.019 $\pm$ 0.010 (0.02)                |
| <b>K+L</b> | 1.236 $\pm$ 0.013 (11.86)                                     | 1.581 $\pm$ 0.013 (8.96)                | 4.996 $\pm$ 0.183 (8.09)                | 9.148 $\pm$ 0.090 (8.04)                |
| <b>M</b>   |                                                               |                                         | 0.042 $\pm$ 0.014 (0.07)                | 0.111 $\pm$ 0.040 (0.10)                |
| <b>N</b>   | 0.418 $\pm$ 0.006 (4.01)                                      | 0.520 $\pm$ 0.373 (2.95)                | 2.133 $\pm$ 0.009 (3.46)                | 4.790 $\pm$ 0.099 (4.21)                |
| <b>O</b>   | 0.707 $\pm$ 0.086 (6.79)                                      | 0.650 $\pm$ 0.026 (3.68)                |                                         |                                         |
| <b>P</b>   | 0.377 $\pm$ 0.022 (3.61)                                      | 0.321 $\pm$ 0.010 (1.82)                |                                         |                                         |
