# Supplementary material for: Plant-endophytes interaction influences the secondary metabolism in Echinacea purpurea (L.) Moench: an in vitro model
Source: Sci Rep. 2017 Dec 5;7:16924. doi: 10.1038/s41598-017-17110-w (PMC5717142; doi:10.1038/s41598-017-17110-w)
Supplement: Supplementary file 5 — Supplementary Table 3 [file 41598_2017_17110_MOESM5_ESM.pdf]

**Plant-endophytes interaction influences the secondary metabolism in *Echinacea purpurea* (L.)**

**Moench: an *in vitro* model.**

Valentina Maggini<sup>1,2,3</sup>, Marinella De Leo<sup>4</sup>, Alessio Mengoni<sup>1</sup>, Eugenia Rosaria Gallo<sup>2,3</sup>, Elisangela Miceli<sup>1</sup>, Rose Vanessa Bandeira Reidel<sup>4</sup>, Sauro Biffi<sup>5</sup>, Luisa Pistelli<sup>4</sup>, Renato Fani<sup>1</sup>, Fabio Firenzuoli<sup>3</sup> and Patrizia Bogani<sup>1</sup>

<sup>1</sup>Department of Biology, University of Florence, Via Madonna del Piano 6, 50019 Sesto Fiorentino, Italy; <sup>2</sup>Department of Experimental and Clinical Medicine, University of Florence, Largo Brambilla 3, 50134 Florence, Italy; <sup>3</sup>Referring Center for Phytotherapy, Tuscany Region, Careggi University Hospital, Largo Brambilla 3, 50134 Florence, Italy; <sup>4</sup>Department of Pharmacy, University of Pisa, Via Bonanno 33, 56126 Pisa, Italy; <sup>5</sup>Botanical Garden Casola Valsenio, Via del Corso 6, 48010 Ravenna, Italy

**Supplementary Table 3.** Spectral (UV and ESI-MS/MS) and chromatographic data (retention time,  $t_R$ ) of alkamides **1-15** detected in *n*-hexane extracts of *E. purpurea* not-infected stem/leaves (SL) and roots (R), used as control, and SL and R infected by *E. purpurea* SL endophytes. MS/MS data are obtained from the fragmentation of the  $[M+H]^+$  precursor ions. The peaks are related to those reported in Supplementary Figs. 2 and 3. Compound numbers are referred to alkamides listed in Table 1.

| Peak | Compound           | $t_R$<br>(min) | M   | $[M+H]^+$ | $[M+Na]^+$ | $[2M+H]^+$ | $[2M+Na]^+$ | MS/MS<br>base peak | MS/MS ions<br>( $m/z$ )                                                                              | $\lambda_{max}$<br>(nm) | Reference |
|------|--------------------|----------------|-----|-----------|------------|------------|-------------|--------------------|------------------------------------------------------------------------------------------------------|-------------------------|-----------|
| A    | 1 and/or 2         | 18.7           | 229 | 230       | 252        | 459        | 481         | 131                | 174 <sup>a</sup> , 157 <sup>b</sup> , 146,<br>129 <sup>c</sup> , 116, 91                             | 260                     | 26        |
| B    | 3 and/or 4         | 22.8           | 243 | 244       | 266        | 487        | 509         | 131                | 216, 174 <sup>c</sup> , 157 <sup>d</sup> ,<br>129 <sup>e</sup> , 117, 91                             | 260                     | 29        |
| C    | NI                 | 23.7           | 263 | 264       | 286        | 527        | 549         | 246                | 222, 175, 147, 105,<br>93                                                                            | 260                     | NR        |
| D    | 5                  | 26.3           | 257 | 258       | 280        | 515        | 537         | 202 <sup>a</sup>   | 185 <sup>a</sup> , 159, 157 <sup>c</sup> ,<br>143, 131, 117, 91                                      | 260                     | 29        |
|      | 6 (only in leaves) | 26.7           | 245 | 246       | 268        | 491        | 513         | 147                | 190 <sup>f</sup> , 173 <sup>b</sup> , 145,<br>131 <sup>e</sup> , 119, 105, 91                        | 260                     | 26        |
| E    | NI                 | 28.3           | 265 | 266       | 288        | 531        | 553         |                    | —                                                                                                    | 260                     | NR        |
| F    | NI                 | 30.1           | 245 | 246       | 268        | 491        | 513         |                    | 221, 203, 190, 175,<br>173, 147, 119, 105,<br>91                                                     | 260                     | NR        |
| G    | 7 and/or 8         | 32.5           | 247 | 248       | 270        | 495        | 518         | 149                | 192 <sup>a</sup> , 175 <sup>b</sup> , 147 <sup>c</sup> ,<br>142, 93, 74                              | 260                     | 26        |
| H    | NI                 | 33.9           | 267 | 268       | 290        | 535        | 557         | —                  | —                                                                                                    | 260                     | NR        |
| I    | NI                 | 34.7           | 285 | 286       | 308        | 571        | 593         | 230                | 213, 195, 185, 171,<br>145, 131, 117, 95                                                             | 250                     | NR        |
| J    | NI                 | 35.4           | 278 | 279       | 301        | 557        | 579         | 204                | 234, 223, 203, 181,<br>163, 149, 135, 95                                                             | 260                     | NR        |
| K    | 9 or 10            | 36.4           | 261 | 262       | 284        | 525        | 545         | 149                | 234, 204, 192 <sup>c</sup> , 181,<br>175 <sup>d</sup> , 156, 147 <sup>e</sup> ,<br>133, 121, 107, 93 | 250                     | 28        |
| L    | 11                 | 36.8           | 249 | 250       | 272        | 499        | 521         | 167                | 194 <sup>a</sup> , 177 <sup>b</sup> , 149 <sup>c</sup> ,<br>135, 121, 109, 95                        | 275                     | 26        |
| M    | NI                 | 39.0           | 275 | 276       | 298        | 551        | 573         | 177                | 220, 203, 175, 135,<br>121, 95                                                                       |                         | NR        |
| N    | 12                 | 41.6           | 251 | 252       | 274        | 503        | 525         | 179 <sup>b</sup>   | 196 <sup>c</sup> , 161, 137,<br>151 <sup>e</sup> , 119, 95, 79                                       | 260                     | 26        |
| O    | 13 or 14           | 23.5           | 243 | 244       | 266        | 487        | 509         | 145                | 216, 202, 188 <sup>a</sup> ,<br>171 <sup>b</sup> , 143 <sup>c</sup> , 129,<br>117, 105, 91           | 260                     | 29        |
| P    | 15                 | 27.7           | 257 | 258       | 280        | 515        | 537         | 145                | 230, 188 <sup>c</sup> , 171 <sup>d</sup> ,<br>143 <sup>f</sup> , 117, 105, 91                        | 260                     | 29        |

<sup>a</sup>Fragment  $[M+H-56]^+$  originated by the loss of the isobutyl group attached to the nitrogen; <sup>b</sup>fragment  $[M+H-73]^+$  due to the loss of the isobutyl amine; <sup>c</sup>fragment  $[M+H-70]^+$  due to the loss of the 2-methylbutyl group attached to the nitrogen; <sup>d</sup>fragment  $[M+H-87]^+$  corresponding to the loss of the 2-methylbutyl amine; <sup>e</sup>fragment  $[M+H-101]^+$  due to the loss of the amide portion from an isobutylamide; <sup>f</sup>fragment  $[M+H-115]^+$  originated by the loss of the amide portion from a 2-methylbutylamide. NR: not reported; NI: not identified. Alkamides not previously reported (peaks **C**, **E**, **F**, **H**, **I**, **J** and **M**) are ascribable to the alkamide class due to the characteristic absorbance at 260 nm and typical ESI-MS and MS/MS spectra. Indeed, masses of alkamide ions are detected with ESI-MS in the positive mode, originating protonated  $[M+H]^+$  and sodiated molecules  $[M+Na]^+$ . Protonated  $[2M+H]^+$  and sodiated dimers  $[2M+Na]^+$  were also commonly observed. Alkamides occurring in *E. purpurea* had structures containing ethylenic and/or acetylenic bonds and an amide portion, constituted by an isobutylamide or a 2-methylbutylamide moiety<sup>2</sup>, displaying a high absorbance at 260 nm. These alkamides were structurally similar and many of them were isomers difficult to separate. Electrospray ionization techniques combined with multi-stage tandem spectrometry (MS<sup>n</sup>) had the advantage of discriminating isobutylamides and 2-methylbutylamides<sup>25</sup>. Furthermore, isomeric alkamides could be distinguished by MS<sup>n</sup> fragmentation patterns<sup>28</sup>. For isobutylamides the MS/MS spectra of deprotonated molecules (compounds **1/2**, **5-8**, **11**, **12**, and **13/14**) showed fragments corresponding to the loss of 56 u for the isobutyl group and 73 u for the isobutyl amine. Fragments corresponding to the loss of 70 u (for the 2-methylbutyl group) and 87 u (2-methylbutyl amine) could be observed for 2-methylbutylamides (compounds **3/4**, **9/10**, and **15**). In addition, diagnostic fragments corresponding to the alkyl chains due to the cleavage of the amide portions were detected (101 u for isobutylamides and 115 u for 2-methylbutylamides)<sup>26,29</sup>.
